# Supplementary material for: Accurate detection of perchlorate in epoxy resins via chlorine-35 quantitative quadrupolar NMR (qQNMR)
Source: Royal Society of Chemistry journal article supplement (doi:10.1039/d2an00759b), 2022-01-01
Supplement: d2an00759b1.pdf [file d2an00759b1.pdf]

1 Supporting information

2

3

4 Accurate Detection of Perchlorate in epoxy resins via Chlorine-35

5 Quantitative Quadrupolar NMR (qQNMR)

6

7

8 Ana Belén Ruiz-Muelle, Felipe Lestón-Cabeo and Ignacio Fernández\*

9

10 Department of Chemistry and Physics, Research Centre CIAIMBITAL, University of

11 Almería, Ctra. Sacramento, s/n, 04120, Almería, Spain

12

13

14

15

16 **Index**

17

18 **Figure S1.**  $^{35}\text{Cl}$  NMR spectra of  $\text{LiClO}_4$  at 294 K in  $\text{DMSO-}d_6$  S2

19 **Figure S2.**  $^{35}\text{Cl}$   $T_1$  and  $T_2$  NMR measurements S3

20 **Figure S3.** Calibration curves of perchlorate solutions in  $\text{DMSO-}d_6$  S4

21 **Figure S4.** Calibration curve of perchlorate in epoxy resin in  $\text{DMSO-}d_6$  S5

22 **Figure S5.**  $^{35}\text{Cl}$   $T_1$  NMR measurements on resin samples S6-S7

23

24  
25  
26

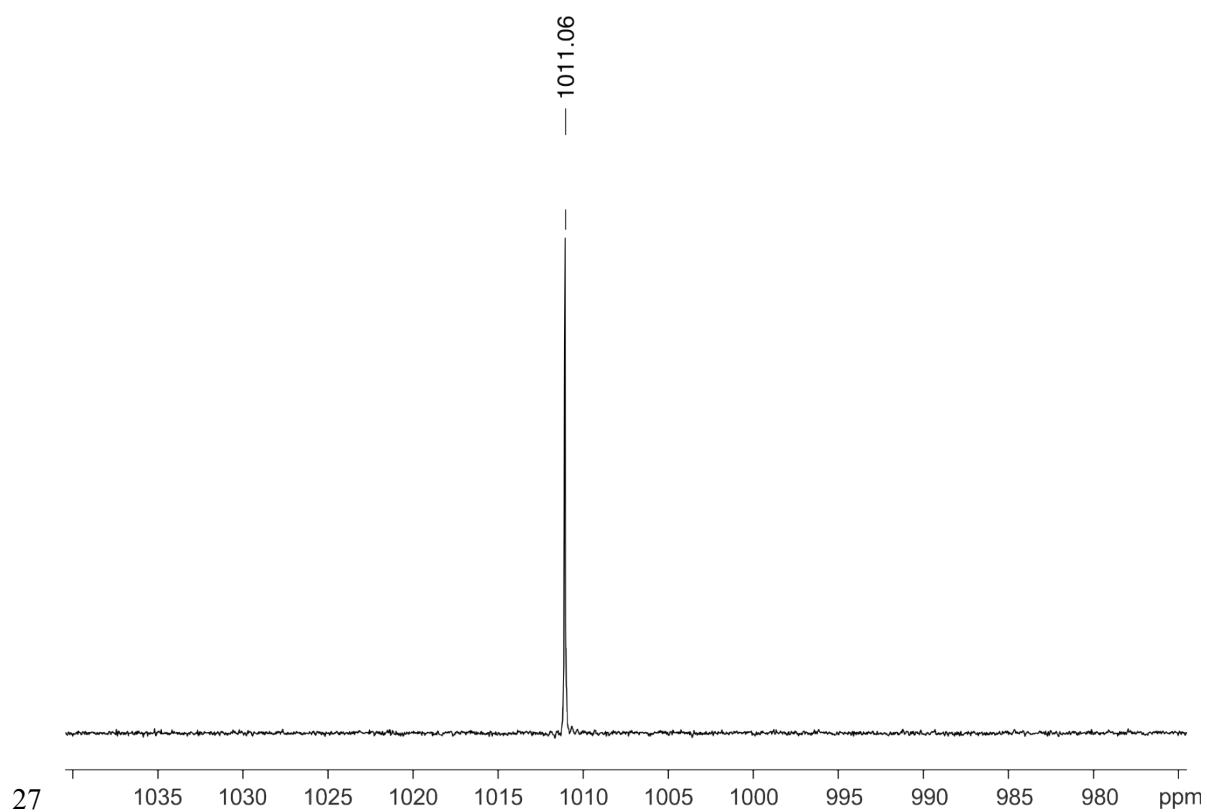

27

28  
29 **Figure S1.**  $^{35}\text{Cl}$  NMR spectra (49.0 MHz) of  $\text{LiClO}_4$  solutions in  $\text{DMSO-}d_6$  at 294 K.  
30 Experimental time of each spectrum of 2 minute and 9 seconds.

31  
32  
33

34

a)

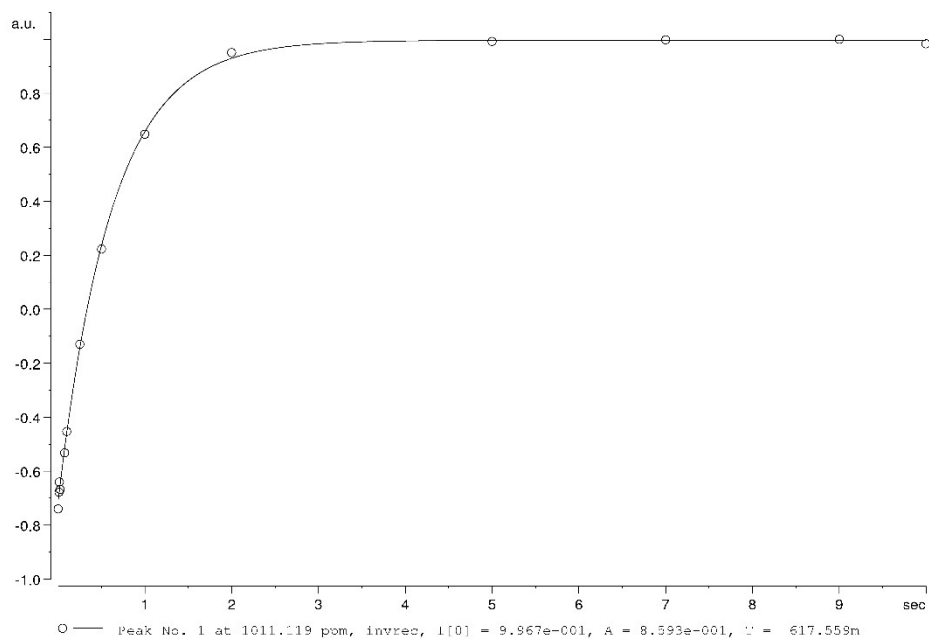

b)

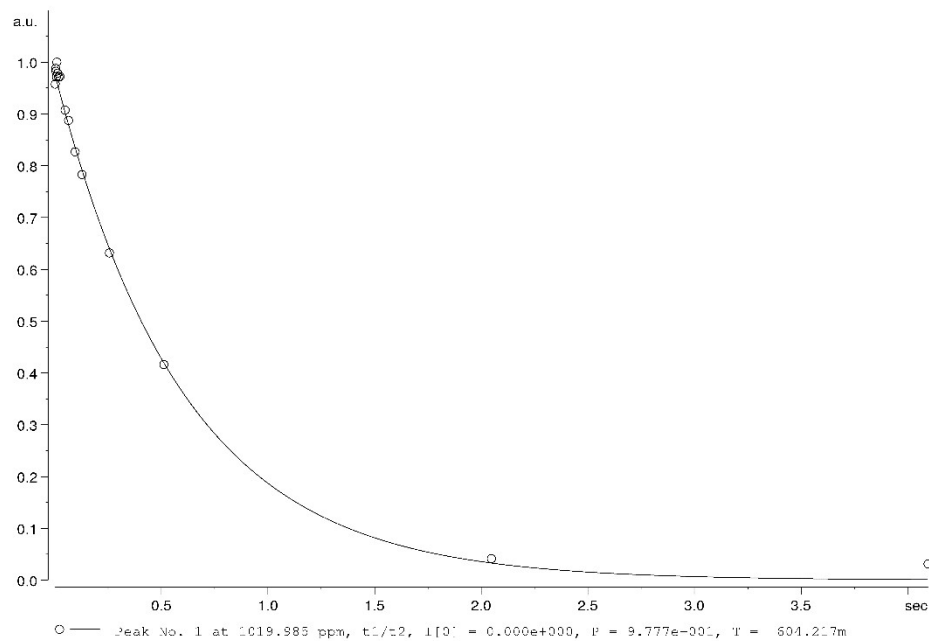

35

36 **Figure S2.**  $^{35}\text{Cl}$  NMR (49.0 MHz)  $T_1$  (top) and  $T_2$  (bottom) NMR measurements on a  
37 13.2 mg/mL sample of  $\text{LiClO}_4$  at 294 K in  $\text{DMSO-}d_6$ .

38

39

40

41 a)

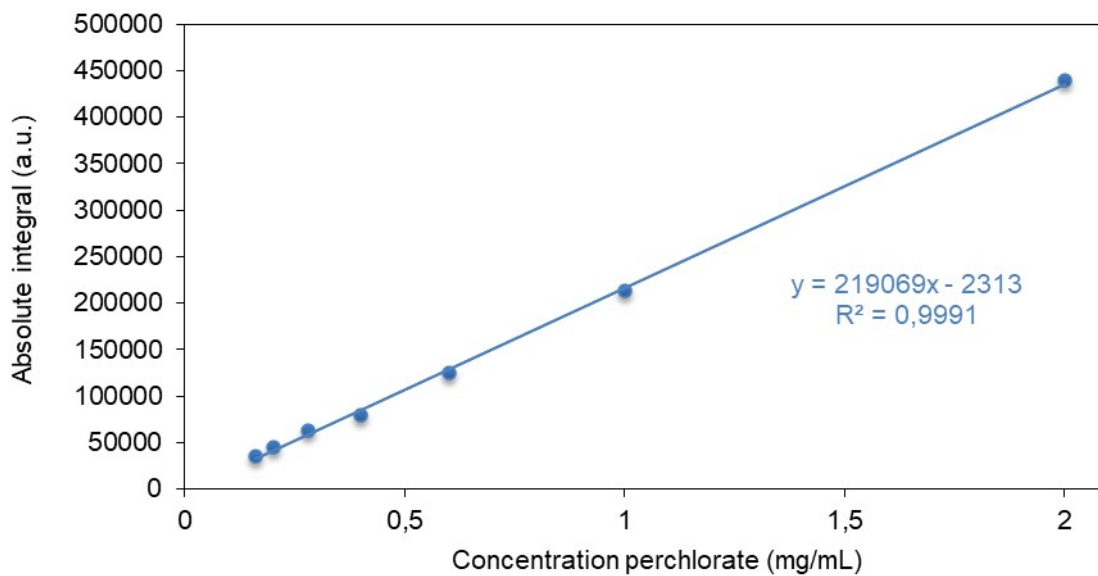

42

43

44 b)

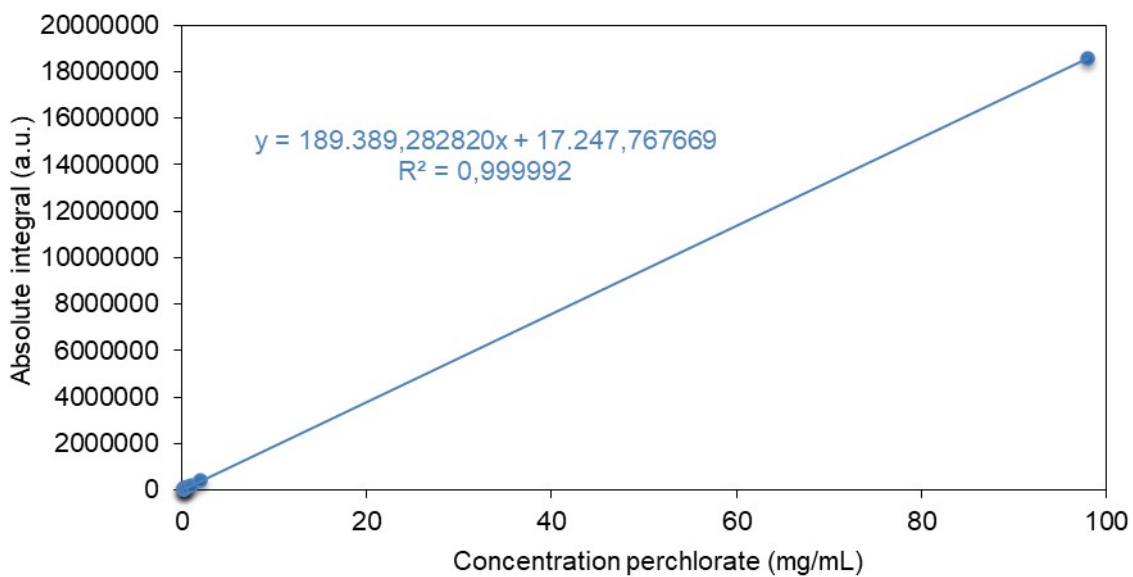

45

46

47 **Figure S3.** a) Calibration curve stack plot of perchlorate solutions in DMSO- $d_6$ ; b) Same  
48 calibration curve but including an extra level of concentration of 98 mg/mL (1M).

49

50

51

52

53

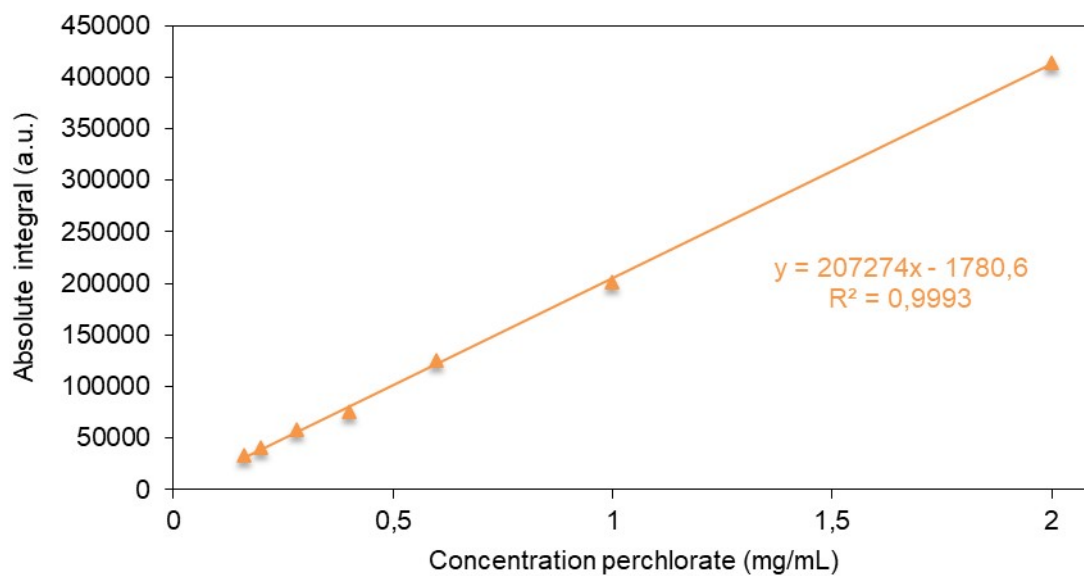

54

55

56 **Figure S4.** Calibration curves prepared with epoxy resin samples spiked with increasing  
57 amounts of perchlorate in DMSO- $d_6$ .

58

59

60

61

62

a)

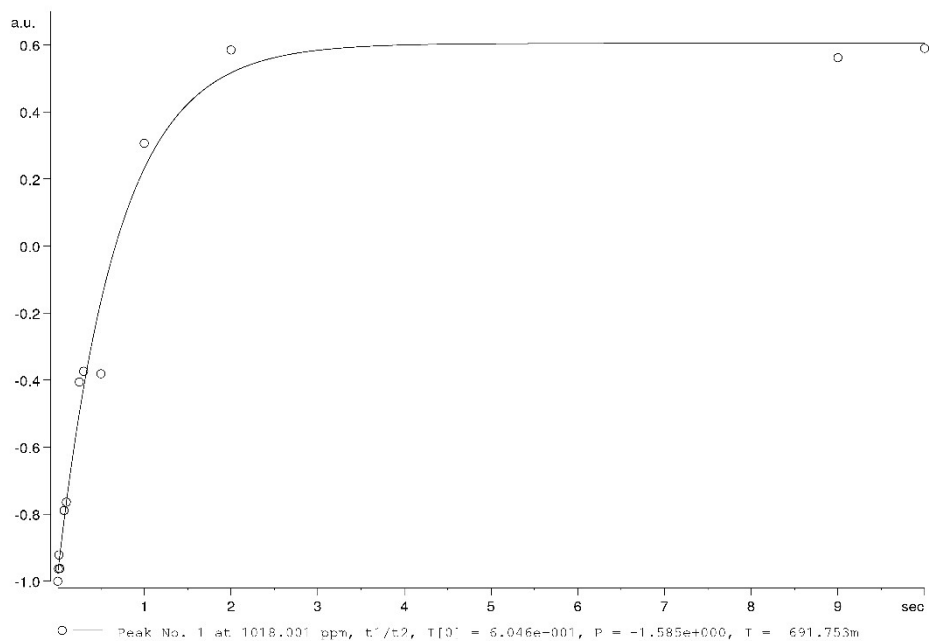

b)

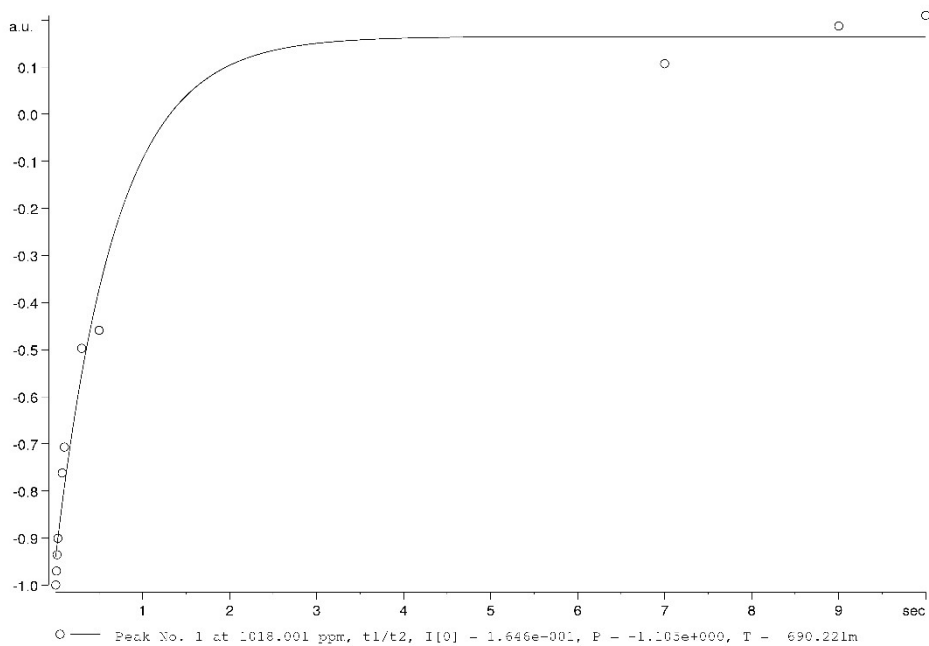

c)

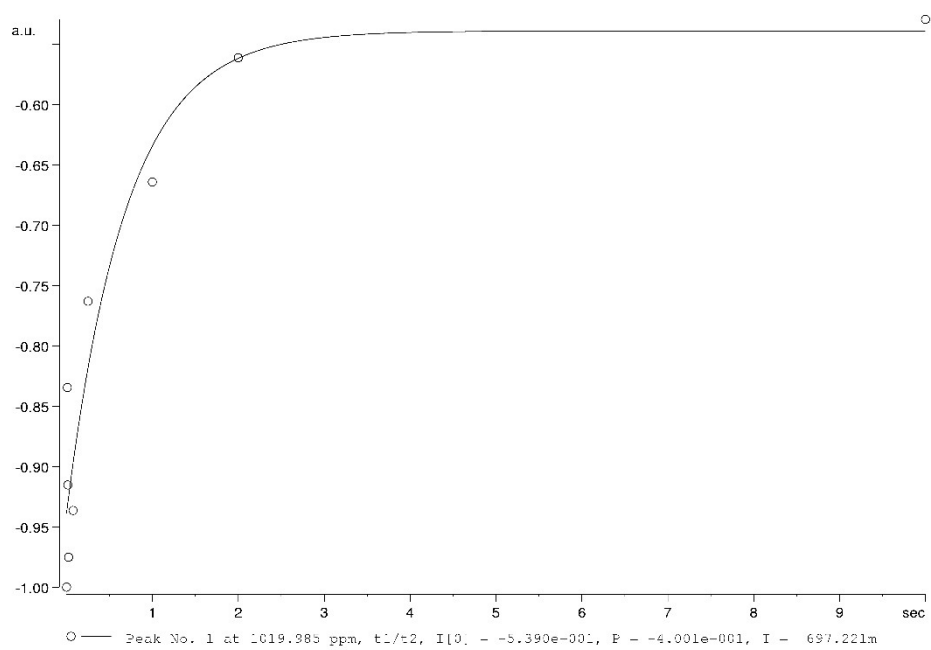

63 **Figure S5.**  $^{35}\text{Cl}$  NMR (49.0 MHz)  $T_1$  NMR measurements on matrix samples containing  
64 a)  $\text{LiClO}_4$ , b)  $\text{KClO}_4$  and c)  $\text{NMe}_4\text{ClO}_4$ , all of them at 294 K in  $\text{DMSO-}d_6$ .

65

66
